# Supplementary material for: There is no magic bullet: the importance of testing reference gene stability in RT-qPCR experiments across multiple closely related species
Source: PeerJ. 2020 Aug 3;8:e9618. doi: 10.7717/peerj.9618 (PMC7409783; doi:10.7717/peerj.9618)
Supplement: Supplemental Information 1 — Each cell represents a Cq-value obtained during qPCR. Empty cells represent replicates for which either no replication was observed or for which the Cq-value was removed from further analysis due to an aberrant melt curve. [file peerj-08-9618-s001.xlsx]

## Sheet: Sheet1
			Act5C					Tub					Hsp70					RIBL5					EF2					GAPDH					Ann					Arm					at		ast		SPPP-4		SPPP-5
Dilution	replicate		piceifrons	americana	cubense	nitens		piceifrons	americana	cubense	nitens		piceifrons	americana	cubense	nitens		piceifrons	americana	cubense	nitens		piceifrons	americana	cubense	nitens		piceifrons	americana	cubense	nitens		piceifrons	americana	cubense	nitens		piceifrons	americana	cubense	nitens		piceifrons		piceifrons		piceifrons		piceifrons
1/1	replicate 1		16.3981	18.6534		19.3407		16.7715	20.0851	18.7578	19.8012		16.0777	19.6386	17.7255	18.757		17.4473	19.095	22.3544	17.6879		20.269	21.2399	21.486	20.8266		15.7132	17.5074		16.1671		20.0211	20.0764	19.9418	19.1285		18.4565	22.5304	20.3429
	replicate 2		16.4822	18.5397		19.369		16.8901	20.0139	18.9141	19.9034		16.594	19.5106	17.7288	18.8906		17.4351	19.08	22.2475	17.9916		19.8622	21.1286	21.5294	21.2369		15.8982	17.3828		16.9798		20.4807	20.1034	19.8072	19.2728		18.6865	22.3259	20.4377
	replicate 3																	17.5473	19.0197	22.361	17.6905													20.1077	19.8611	19.1252
1/10	replicate 1		19.378	21.6076		22.2772		19.7407	22.9771	21.9077	22.6385		19.103	22.4916	20.5369	21.6716		20.3605	21.8075	25.1031	20.7753		23.6602	24.1254	24.6226	23.5058		18.7697	20.2135		19.1819		22.8391	22.9855	22.5667	22.1282		21.772	25.4696	23.47
	replicate 2		19.3174	21.4159		22.294		19.5381	22.9949	22.0163	22.6569		19.0516	22.3404	20.4548	21.5604		20.2897	21.6217	25.076	20.5071		22.7241	24.7647	24.4657	23.4503		18.7236	20.1189		19.1101		22.6846	23.4063	22.6221	22.1335		21.5501	25.3565	23.3643
	replicate 3																	20.2773	21.7504	25.0134	20.7061												22.7389	22.7689	22.6794	22.1771
1/100	replicate 1		22.9191	25.1011		25.8504		23.2697	26.5176	25.4051	25.803		22.4705	26.2075	23.9329	25.6983		23.7433	25.172	28.6045	24.138		27.0448	27.7061	28.1001	26.9078		22.1719	23.5237		22.6105		26.8948	26.3597	26.0454	25.5444		25.2077	28.7165	26.8148
	replicate 2		23.0618	25.1746		25.9545		23.3792	26.6155	25.3787	26.0066		22.5583	26.1091	24.0231	25.4044		23.571	25.1677	28.4345	24.2343		26.511	27.9511	28.1391	27.0462		22.2448	23.9167		22.6938		26.2111	26.3157	26.1764	25.6004		25.5363	28.8652	26.867
	replicate 3																	23.9001	25.152	28.4653	24.2365												26.6188	26.2715	26.1975	25.537
1/1,000	replicate 1		26.4667	28.8267		30.0915		26.8554	29.7837	29.1129	29.1311		26.1395	29.5981	27.4243	29.0965		27.0996	28.7836	32.165	27.8231		29.9115	31.4422	31.5023	30.5148		25.6806	27.1043		26.2398		30.2652	29.7426	29.717	29.6947		29.4176	32.4469	30.3156
	replicate 2		26.3105	28.6282		29.4024		26.8408	29.8154		29.2005		25.8674	29.5733	27.3108	28.6979		27.0916	28.6475		27.6411		29.6158	31.4079	31.2159	30.3674		25.6753	27.2112		26.0272		29.9551	29.7404	29.5527	29.1325		29.245	32.187	30.3056
	replicate 3																	27.0572	28.8583	31.7424	27.7411												30.0855	29.7045	29.8675	29.3333
1/10,000	replicate 1		29.6017	32.6945		33.0777		30.3912	32.7683	33.0781	32.5735		29.5065	33.0785	31.4086	32.3631		30.2615	31.7413		31.2152		33.179		35.038	34.0817		29.2494	30.008		29.413		33.0869	33.8968		32.6277		32.8042	35.4649	33.7496
	replicate 2		30.1638	32.4418		32.7876		30.3268	33.837	32.3056	32.5635		29.5189	33.8023	31.1104	32.5965		30.7971	32.9722		31.0023		33.599	34.7623		33.8985		29.4071	30.3605		29.4762		33.1281			32.8123		33.1587	36.1759	33.1154
	replicate 3																	30.9567	32.3516		31.4276												33.0224	34.0046		33.1176
			Act5C					Tub					Hsp70					RIBL5					EF2					GAPDH					Ann					Arm					at		ast		SPPP-4		SPPP-5
			piceifrons	americana	cubense	nitens		piceifrons	americana	cubense	nitens		piceifrons	americana	cubense	nitens		piceifrons	americana	cubense	nitens		piceifrons	americana	cubense	nitens		piceifrons	americana	cubense	nitens		piceifrons	americana	cubense	nitens		piceifrons	americana	cubense	nitens		piceifrons		piceifrons		piceifrons		piceifrons
1/1	replicate 1				17.1432																									15.6675											22.5229		25.1397		25.6443		24.9586		19.3693
	replicate 2				17.1658																									15.9747											22.4914		25.1621		25.697		24.9795		19.4188
1/5	replicate 1				18.9032																									17.4638											24.3683		26.7284		27.7023		26.4009		21.0085
	replicate 2				18.7046																									17.452											24.0741		26.55		27.6599		26.3788		20.9862
1/25	replicate 1				21.1467																									20.0407													28.9214		29.709		28.6559		23.1914
	replicate 2				21.2688																									19.7063											26.5363		28.7974		29.8802		28.4354		23.1412
1/125	replicate 1				23.5578																									22.2769											28.8619		31.1791		32.3828		30.7711		25.4456
	replicate 2				23.3691																									22.1497											28.4127		31.3712		32.5398		30.5852		25.4045
1/625	replicate 1				25.8801																									24.7383											31.0942		33.6489				33.2925		27.7514
	replicate 2				26.0349																									24.4917											30.8947		33.2072				33.0534		27.9208
1/3,125	replicate 1				28.3749																									27.3212																	35.7638		30.1161
	replicate 2				28.1896																									26.8385																	34.8244		30.283
