# Supplementary material for: There is no magic bullet: the importance of testing reference gene stability in RT-qPCR experiments across multiple closely related species
Source: PeerJ. 2020 Aug 3;8:e9618. doi: 10.7717/peerj.9618 (PMC7409783; doi:10.7717/peerj.9618)
Supplement: Supplemental Information 2 — Empty cells represent replicates for which no replication was observed, or for which the Cq-value was removed from further analysis due to an abberant melt curve. [file peerj-08-9618-s002.xlsx]

## Sheet: Sheet1
		act5C	Ann	Arm	EF2	GAPDH	Hsp70	RIBL5	Tub					act5C	Ann	Arm	EF2	GAPDH	Hsp70	RIBL5	Tub					act5C	Ann	Arm	EF2	GAPDH	Hsp70	RIBL5	Tub					act5C	Ann	Arm	EF2	GAPDH	Hsp70	RIBL5	Tub
piceifrons crowded 1 head	replicate 1	20.2381	23.25	27.2573	22.2516	19.5881	19.1778	21.0778	20.9347			americana crowded 1 head	replicate 1	20.6385	23.0846	25.4935	21.9786	19.5316	18.3395	21.6044	21.3658			cubense crowded 1 head	replicate 1	19.5122	22.655	24.9252	20.6742	18.2203	18.5825	21.009	21.5047			nitens crowded 1 head	replicate 1	21.8322	24.4598	28.7379	24.3618	20.2515	20.7991	22.3935	22.5841
	replicate 2	20.3022	23.3952	27.264	22.3157	19.5975	19.1942	21.0407	20.7809				replicate 2	20.5652	22.9017	25.4766	21.8849	19.5265	18.3521	21.5534	21.2867				replicate 2	19.518	22.5999	24.8632	20.4772	18.1568	18.5441	21.0729	21.4627				replicate 2	21.8543	24.4456	28.7521	24.3968	20.292	20.749	22.4079	22.5315
piceifrons crowded 2 head	replicate 1	20.7743	23.3612	28.2901	23.6413	18.8307	19.431	21.2975	22.0298			americana crowded 2 head	replicate 1	19.9659	22.0558	24.219	20.7211	19.2439	18.7411	20.897	21.4468			cubense crowded 2 head	replicate 1	19.5928	21.5023	24.2339	20.9741	18.9588	19.096	20.774	21.5744			nitens crowded 2 head	replicate 1	20.0347	23.5143	26.4917	23.3084	19.2693	19.4817	21.6492	22.0581
	replicate 2	20.7373	23.3158	27.4757	23.5704	18.8189	19.4187	21.2303	21.9885				replicate 2	20.042	22.154	24.1687	20.9694	19.3139	18.6632	20.8557	21.5177				replicate 2	19.524	21.4962	24.2882	21.0279	18.9967	19.0894	20.7258	21.4984				replicate 2	20.0574	23.4938	26.8467	23.3248	19.3233	19.4353	21.6172	22.1798
piceifrons crowded 3 head	replicate 1	19.024	22.2641	26.3119	21.8759	18.189	17.5201	20.7524	20.0516			americana crowded 3 head	replicate 1	20.3036	23.3626	24.8288	21.0151	20.7096	18.7556	20.9024	21.552			cubense crowded 3 head	replicate 1	19.1143	21.1968	23.7944	20.8579	18.4783	18.8754	20.687	21.3076			nitens crowded 3 head	replicate 1	19.5674	23.7889	25.7394	21.9391	20.6144	19.5415	20.5135	22.0971
	replicate 2	19.044	22.5157	26.378	21.8887	18.2353	17.5324	20.7475	20.075				replicate 2	20.2395	23.2274	25.0569	21.0969	20.6898	18.6965	20.9722	21.5933				replicate 2	19.0957	21.2551	23.897	20.9299	18.432	18.8702	20.6265	21.3788				replicate 2	19.5561	23.8178	25.8418	21.89	20.5605	19.5951	20.4966	22.0804
piceifrons crowded 4 head	replicate 1	21.6214	23.8842	28.009	23.5467	20.8555	19.3871	22.0072	22.8687			americana crowded 4 head	replicate 1	21.2614	23.7328	26.318	22.3753	19.0158	19.232	21.5188	22.0418			cubense crowded 4 head	replicate 1	20.0353	22.4654	24.5771	21.2599	19.3215	19.5864	20.6991	21.9936			nitens crowded 4 head	replicate 1	19.4251	23.2545	25.709	21.7495	19.2002	18.7687	20.9253	22.7194
	replicate 2	21.5476	24.0473	28.0655	23.4271	20.8521	19.5379	21.9364	22.8237				replicate 2	21.2207	23.8864	26.2199	22.3724	18.975	19.2119	21.5933	22.0848				replicate 2	19.8458	22.6035	24.5615	21.2477	19.3602	19.6198	20.6941	21.9331				replicate 2	19.3801	23.3431	25.8228	21.7242	19.1762	18.8564	20.8678	22.6256
piceifrons crowded 5 head	replicate 1	20.7946	24.0754	27.0498	23.0853	19.1686	20.3926	21.9208	22.0865			americana crowded 5 head	replicate 1	19.9032	22.6077	24.8958	21.034	18.1998	18.1619	20.7169	21.0867			cubense crowded 5 head	replicate 1	20.3292	22.7066	25.4009	21.6184	18.8476	19.6955	21.54	22.5567			nitens crowded 5 head	replicate 1	20.4371	24.0299	26.1978	22.8985	18.91	19.715	21.6391	22.0579
	replicate 2	20.8397	24.0215	27.1078	23.1569	19.2341	20.4235	21.9002	22.0891				replicate 2	19.7934	22.6514	24.8503	21.0424	18.1359	18.1853	20.7523	21.0879				replicate 2	20.3679	22.8474	25.6003	21.5643	18.9039	19.6733	21.5808	22.5489				replicate 2	20.4169	24.0604	26.2331	22.8345	18.8634	19.7058	21.6361	21.9331
piceifrons isolated 1 head	replicate 1	20.6612	24.1439	26.3533	22.0166	19.3722	19.5541	21.3977	22.7301			americana isolated 1 head	replicate 1	19.8459	21.669	24.5525	20.9283	18.5228	18.7254	21.032	20.9046			cubense isolated 1 head	replicate 1	20.0631	22.4747	25.0086	21.1231	18.0337	19.1467	21.1785	21.3755			nitens isolated 1 head	replicate 1	20.1356	23.8706	25.1068	22.1243	19.0574	19.426	21.8382	22.2982
	replicate 2	20.416	24.1148	26.2635	22.0256	19.577	18.9729	20.9411	22.7461				replicate 2	19.724	21.5805	24.4012	20.8603	18.5183	18.6859	20.9309	20.9437				replicate 2	19.9928	22.4455	25.0777	21.045	17.9392	19.1819	21.1742	21.3328				replicate 2	20.0477	23.4541	25.4462	22.2035	18.9515	19.4057	21.7933	22.2479
piceifrons isolated 2 head	replicate 1	20.7421	24.2168	26.5114	22.0345	19.1725	19.7544	21.318	21.8131			americana isolated 2 head	replicate 1	19.7881	22.1631	24.2426	20.7824	18.2411	18.6917	20.8023	21.3836			cubense isolated 2 head	replicate 1	19.963	23.1073	24.8168	21.0831	18.0251	19.4039	20.926	21.892			nitens isolated 2 head	replicate 1	20.0599	23.6361	25.9156	22.0962	19.1248	19.1867	21.0203	21.9629
	replicate 2	20.8014	24.1774	26.6123	22.1086	19.2094	19.6683	21.3505	21.8867				replicate 2	19.8565	22.0509	24.277	20.8375	18.3193	18.6948	20.8673	21.3894				replicate 2	20.0168	22.8052	24.8656	21.1353	18.0485	19.2882	20.8642	21.8731				replicate 2	20.2241	23.6157	26.0423	22.1304	19.2008	18.4546	21.0786	22.2133
piceifrons isolated 3 head	replicate 1	21.5424	24.5083	27.5139	22.8368	19.7634	20.5118	22.0858	22.9302			americana isolated 3 head	replicate 1	20.2024	22.0957	24.3273	20.7895	18.5088	18.7688	21.1713	21.4946			cubense isolated 3 head	replicate 1	20.172	23.1228	25.1827	21.0975	18.5529	19.2505	21.23	23.0021			nitens isolated 3 head	replicate 1	20.5601	23.8503	26.1839	22.3189	19.6988	19.5925	21.6169	22.6879
	replicate 2	21.5645	24.7214	27.5259	22.7784	19.7206	20.6364	21.897	23.0394				replicate 2	20.1392	22.4249	24.5511	20.9151	18.6311	18.7703	21.1979	21.6507				replicate 2	20.95	23.0904	25.2377	21.1033	18.5443	19.2932	21.272	22.9448				replicate 2	20.5232	23.9233	26.3677	22.3485	19.6543	19.5777	21.6445	22.7033
piceifrons isolated 4 head	replicate 1	21.6428	24.8539	27.5627	23.3182	19.6129	20.826	22.1535	23.1177			americana isolated 4 head	replicate 1	20.6716	22.9921	25.6231	21.5935	19.3335	19.3679	21.5827	23.069			cubense isolated 4 head	replicate 1	19.3717	22.1358	24.0423	20.2157	17.7414	18.5445	20.5187	21.0034			nitens isolated 4 head	replicate 1	19.8138	23.3964	26.9941	21.4966	18.6696	17.9573	21.2125	22.3357
	replicate 2	21.7395	24.9	27.5132	23.2718	19.6496	20.9901	22.2688	23.1628				replicate 2	20.707	22.8365	25.7942	21.5878	19.3724	19.3108	21.593	23.1076				replicate 2	19.4098	22.1241	24.0324	20.2208	17.7179	18.4999	20.5135	20.9599				replicate 2	19.9554	23.3554	25.548	21.4975	18.7217	18.1086	20.6785	22.5126
piceifrons isolated 5 head	replicate 1	21.8785	24.8487	28.3731	23.5013	19.6503	20.3944	21.7146	23.7828			americana isolated 5 head	replicate 1	20.5817	22.4126	24.947	21.3513	18.6181	19.5246	21.3574	21.0761			cubense isolated 5 head	replicate 1	19.6097	22.4925	24.681	20.7557	18.8355	19.2988	20.733	22.6798			nitens isolated 5 head	replicate 1	19.84	23.2624	25.9337	22.0461	18.862	18.8404	21.322	22.8361
	replicate 2	21.8768	24.8601	28.3918	23.5435	19.6144	20.3258	21.8166	23.6298				replicate 2	20.602	22.7001	25.1295	21.48	18.6671	19.5613	21.3341	21.1237				replicate 2	19.5765	22.4866	24.7153	20.7151	18.8405	19.3405	20.7417	22.821				replicate 2	19.9276	23.3276	26.1038	22.1887	19.1129	18.8547	21.3464	22.9037
non-template control	replicate 1	37.284		38.2493								non-template control	replicate 1		35.5377	38.4013	38.7812							non-template control	replicate 1		38.2248	37.6555	33.2822	39.1849						non-template control	replicate 1				39.6515
	replicate 2						37.8072	39.5336					replicate 2		36.1157	39.6801	32.1488								replicate 2		37.1784	37.2224	33.4223								replicate 2				39.8495
		act5C	Ann	Arm	EF2	GAPDH	Hsp70	RIBL5	Tub					act5C	Ann	Arm	EF2	GAPDH	Hsp70	RIBL5	Tub					act5C	Ann	Arm	EF2	GAPDH	Hsp70	RIBL5	Tub					act5C	Ann	Arm	EF2	GAPDH	Hsp70	RIBL5	Tub
piceifrons crowded 1 thorax	replicate 1	19.3964	23.0254	25.4613	21.2739	19.6926	18.8297	20.5695	20.1878			americana crowded 1 thorax	replicate 1	20.2165	23.7533	26.4784	22.4859	19.6389	19.5775	21.2633	21.7816			cubense crowded 1 thorax	replicate 1	19.4125	23.5701	25.5214	21.3499	18.9411	18.7774	20.5866	22.0197			nitens crowded 1 thorax	replicate 1	20.0488	23.5229	25.7294	21.6535	20.3687	18.6348	20.9659	21.5108
	replicate 2	19.4363	22.9323	25.4522	21.2971	19.6356	18.6072	20.4666	20.2408				replicate 2	20.2071	23.6919	26.5493	22.3646	19.8253	19.4655	21.1691	21.7677				replicate 2	19.3646	23.4631	25.5507	21.3013	18.9034	18.5645	20.5707	22.0005				replicate 2	20.0278	23.4117	25.6469	21.5802	20.3088	18.5723	20.8952	21.4571
piceifrons crowded 2 thorax	replicate 1	18.8446	22.4622	24.6898	21.4536	18.6256	18.0473	21.1103	19.8887			americana crowded 2 thorax	replicate 1	18.8267	22.4717	25.3927	21.8682	18.8042	19.2034	20.6823	22.0482			cubense crowded 2 thorax	replicate 1	19.1531	23.2039	25.108	21.1055	19.0271	19.0173	20.2339	22.0313			nitens crowded 2 thorax	replicate 1	19.5334	23.0101	24.9879	22.3	18.7359	19.0863	21.4747	21.9538
	replicate 2	18.9524	22.5116	24.6882	21.5472	18.6105	18.0086	21.1913	19.9579				replicate 2	18.8763	22.5408	25.7778	21.9652	18.7522	19.2472	20.6883	22.094				replicate 2	19.2569	23.1697	25.1284	21.0169	19.0216	19.0919	20.1585	22.0839				replicate 2	19.4743	23.0116	25.0754	22.368	18.8315	19.0735	21.4806	21.9384
piceifrons crowded 3 thorax	replicate 1	19.7199	23.1484	25.3431	21.9118	19.2718	18.6221	20.9898	21.2415			americana crowded 3 thorax	replicate 1	19.4324	23.4953	26.1691	22.094	19.7572	19.3073	21.0738	22.11			cubense crowded 3 thorax	replicate 1	20.0357	23.588	25.6289	21.9824	18.5124	19.4069	20.7686	21.2285			nitens crowded 3 thorax	replicate 1	20.1052	24.2769	26.3477	22.8869	20.7255	20.2167	22.2038	23.7165
	replicate 2	19.7116	23.1469	25.3647	21.8106	19.2917	18.6905	21.0344	21.3262				replicate 2	19.4717	23.6161	26.1488	22.1218	19.8304	19.3605	21.202	22.1066				replicate 2	20.0113	23.6586	25.5795	22.0218	18.5203	19.4867	20.7121	21.1849				replicate 2	20.0287	24.3153	26.3664	22.8836	20.7556	20.3726	22.2271	23.7927
piceifrons crowded 4 thorax	replicate 1	20.5934	23.631	25.863	21.8799	20.8415	18.5109	21.2127	21.8731			americana crowded 4 thorax	replicate 1	20.3753	23.7757	26.7943	23.1068	19.3715	19.8355	21.4115	21.7388			cubense crowded 4 thorax	replicate 1	19.7899	23.8382	25.7708	21.8083	19.2871	19.2077	20.8622	22.3711			nitens crowded 4 thorax	replicate 1	19.8517	23.571	25.8289	20.6047	20.2415	19.0808	21.0751	23.024
	replicate 2	20.5065	23.6937	26.1041	21.9078	20.8056	18.7469	21.1926	21.754				replicate 2	20.3503	23.9915	26.7483	23.1802	19.3907	19.9304	21.3932	21.8262				replicate 2	19.7823	23.8994	25.8379	21.8048	19.2294	19.2084	20.8708	22.18				replicate 2	19.805	23.6518	26.1287	21.9866	20.1537	19.1021	21.0858	22.9844
piceifrons crowded 5 thorax	replicate 1	20.7791	24.0711	26.4029	22.0843	19.669	20.9329	22.5651	22.2778			americana crowded 5 thorax	replicate 1	19.2542	23.0103	25.5235	21.5734	18.6868	18.9418	20.7744	20.8967			cubense crowded 5 thorax	replicate 1	19.9151	23.7168	25.5381	22.1143	19.1175	19.3988	21.0434	22.2806			nitens crowded 5 thorax	replicate 1	20.2505	23.5171	26.0604	22.5871	18.9735	19.9078	21.5358	21.5328
	replicate 2	20.8351	24.0708	26.438	22.137	19.5984	20.9887	22.5692	22.2685				replicate 2	19.2528	23.1622	25.5643	21.5372	18.6806	18.9808	20.8058	20.8566				replicate 2	19.8353	23.6856	25.5295	22.0951	19.0625	19.3858	21.0767	22.1583				replicate 2	20.2365	23.5685	25.7184	23.1024	19.1917	19.9873	21.3826	21.6456
piceifrons isolated 1 thorax	replicate 1	20.1068	24.3509	27.1911	21.8937	20.1948	19.5833	21.1475	23.0353			americana isolated 1 thorax	replicate 1	18.9773	22.4439	24.9508	20.8919	18.4471	18.9178	20.2816	20.2071			cubense isolated 1 thorax	replicate 1	18.9558	22.5827	24.8285	20.8403	18.4935	18.0946	20.1684	20.6472			nitens isolated 1 thorax	replicate 1	19.2108	22.8824	24.6145	21.0844	18.8404	18.5541	20.9663
	replicate 2	20.0368	24.3223	27.1605	21.8858	20.1154	19.6619	21.1869	22.9737				replicate 2	18.9768	22.2782	25.0084	20.8857	18.3762	18.9405	20.2072	20.1269				replicate 2	19.0045	22.6651	24.8362	20.7058	18.4258	18.1561	20.1603	20.6113				replicate 2	19.2065	22.8265	24.5993	21.0077	18.7965	18.5334	20.9592
piceifrons isolated 2 thorax	replicate 1	20.3667	24.4804	27.0167	22.7595	19.847	20.3802	21.563	22.4536			americana isolated 2 thorax	replicate 1	19.235	22.2331	25.098	21.4577	18.0533	19.4497	20.7239	21.0823			cubense isolated 2 thorax	replicate 1	18.6345	23.1209	24.8643	21.7416	18.6662	19.03	20.4732	21.4745			nitens isolated 2 thorax	replicate 1	19.5298	23.4741	25.1398	21.0817	19.4732	18.5363	20.7671	21.9102
	replicate 2	20.4061	24.3384	27.1417	22.7794	19.924	20.2724	21.588	22.4689				replicate 2	19.2206	20.785	25.0132	21.4697	18.1275	19.3647	20.7191	21.0968				replicate 2	18.6827	22.9986	24.9297	21.5031	18.6865	18.8414	20.5899	21.4233				replicate 2	19.5542	23.3516	25.1828	21.0715	19.374	18.4451	20.7662	21.8444
piceifrons isolated 3 thorax	replicate 1	20.6499	24.6221	27.1904	21.8376	21.0172	19.5623	21.0726	23.2359			americana isolated 3 thorax	replicate 1	19.1859	22.4776	24.938	21.1711	26.6251	18.8733	20.4767	20.7741			cubense isolated 3 thorax	replicate 1	19.531	22.59	24.5608	21.9999	18.5245	18.899	21.0874	21.4907			nitens isolated 3 thorax	replicate 1	19.9377	23.6073	25.8673	21.7115	20.0153	19.2288	21.1138	22.0684
	replicate 2		24.6571	27.3037	21.8183	21.0595	19.6218	21.1445	23.2493				replicate 2	19.1517	22.3021	25.8603	21.2015	18.9941	18.8225	20.5693	20.8183				replicate 2	19.4949	22.5518	24.6196	21.9004	18.4928	18.7106	21.1329	21.5563				replicate 2	19.9907	23.6217	25.9026	21.6799	20.0571	19.2038	21.1488	22.117
piceifrons isolated 4 thorax	replicate 1	20.8034	24.4255	27.0006	23.4305	20.2215	19.967	21.0998	22.5314			americana isolated 4 thorax	replicate 1	19.3687	23.1104	27.0165	21.4868	18.8728	19.1928	20.6477	21.629			cubense isolated 4 thorax	replicate 1	19.8262	23.9437	25.3562	21.9004	19.2374	19.2622	20.6524	21.648			nitens isolated 4 thorax	replicate 1	19.8895	23.6182	26.1325	21.713	19.4202	19.1041	21.3423	22.833
	replicate 2	20.7793	24.4409	26.9905	23.3141	20.2162	19.608	21.1066	22.4976				replicate 2	19.3586	22.7098	26.202	21.5166	19.4061	19.0526	20.6521	21.8084				replicate 2	19.8676	23.9693	25.349	21.7898	19.1371	19.2762	20.7082	21.6132				replicate 2	19.95	23.7064	26.1094	21.7109	19.443	19.1605	21.2761	22.7383
piceifrons isolated 5 thorax	replicate 1	20.5904	24.2139	26.5933	22.3304	20.1186	19.4392	20.849	21.5504			americana isolated 5 thorax	replicate 1	19.5107	20.8616	26.4018	21.8325	18.6261	19.7579	21.0313	20.8542			cubense isolated 5 thorax	replicate 1	18.9112	23.0531	24.7384	21.2363	18.6641	18.4185	20.203	21.6721			nitens isolated 5 thorax	replicate 1	19.4485	23.2898	25.8056	21.6225	19.0014	18.4972	21.0569	22.6129
	replicate 2	20.6633	24.2007	26.7056	22.2449	20.1073	19.4647	20.918	21.6614				replicate 2	19.5336	22.3374	25.798	21.8734	18.9372	19.8654	21.008	20.8795				replicate 2	18.9158	23.1173	24.8411	21.1536	18.7107	18.5103	20.3034	20.9968				replicate 2	19.4463	23.2715	25.8477	21.6022	18.989	18.4599	21.0873	22.5602
non-template control	replicate 1				37.262		35.8433	35.4287	37.9043			non-template control	replicate 1											non-template control	replicate 1		39.4962	39.1122	35.6109		39.3006		38.5776			non-template control	replicate 1		39.2855					37.8904
	replicate 2	35.7424	38.2389		38.4125	37.4816	36.611						replicate 2	39.0626			39.3812	37.4358							replicate 2		38.4072	38.7807									replicate 2							37.9014
