# Supplementary material for: There is no magic bullet: the importance of testing reference gene stability in RT-qPCR experiments across multiple closely related species
Source: PeerJ. 2020 Aug 3;8:e9618. doi: 10.7717/peerj.9618 (PMC7409783; doi:10.7717/peerj.9618)
Supplement: Supplemental Information 3 — Empty cells represent replicates for which no replication was observed, or for which the Cq-value was removed from further analysis due to an abberant melt curve. [file peerj-08-9618-s003.xlsx]

## Sheet: Sheet1
		Act5C	Ann	Arm	EF2	GAPDH	Hsp70	RIBL5	SPPP-4	SPPP-5	ast	at
piceifrons crowded 1 thorax	replicate 1	18.1462	21.4909	23.0418	19.959	17.654	16.564	20.0695	24.3458	20.4821	30.6199	30.5186
	replicate 2	18.1358	21.4834	23.0735	19.8932	17.6707	16.535	19.9562	24.3206	20.5982	29.3153	31.0333
piceifrons crowded 2 thorax	replicate 1	18.2353	21.8259	23.1049	20.2752	17.9638	17.8897	20.8562	22.8386	19.8229	28.948	30.0048
	replicate 2	18.2478	21.823	23.1221	20.1619	17.9871	17.8357	20.7214	22.7923	19.8285	28.7957	30.0705
piceifrons crowded 3 thorax	replicate 1	17.9472	21.018	22.4281	18.7957	18.274	15.485	19.0073	23.0828	18.6561	27.3801	28.3836
	replicate 2	17.9539	21.0311	22.536	18.7702	18.1809	15.5765	19.0668	23.113	18.7217	27.5574	28.6675
piceifrons crowded 4 thorax	replicate 1	17.8357	20.9849	22.1004	18.4747	18.2337	16.0576	18.9026	23.8676	19.3386	27.4002	28.2729
	replicate 2	17.6603	21.0897	22.1622	18.3635	16.1603	16.1914	18.8604	23.6489	19.3246	27.5215	28.0973
piceifrons crowded 5 thorax	replicate 1	16.5104	20.0669	20.8623	18.3251	16.5013	14.63	18.6551	21.546	17.9306	27.9125	28.2113
	replicate 2	16.3148	20.1783	21.1872	18.2672	16.4136	14.8889	18.7629	21.6479	17.9766	27.735	28.3912
piceifrons isolated 1 thorax	replicate 1	19.15	22.2646	24.2299	20.1809	18.6324	17.7503	19.4347	25.4369	21.3276	27.8549	30.4587
	replicate 2	19.1035	22.2071	24.3109	20.1652	18.4832	17.7566	19.3594	25.3905	21.3983	27.9786	30.2651
piceifrons isolated 2 thorax	replicate 1	19.4686	22.7006	24.8692	20.547	18.2913	18.0807	19.8724	25.6798	21.8727	28.093	29.8402
	replicate 2	19.4908	22.5897	24.803	20.5087	18.3097	18.109	19.8653	25.6995	21.7529	27.9461	29.5212
piceifrons isolated 3 thorax	replicate 1	18.837	22.9725	25.1526	20.2351	18.5062	18.2166	20.0232	24.4602	20.3387	28.1261	28.7089
	replicate 2	18.7999	23.0605	25.1598	20.2821	18.4324	18.1757	20.0069	24.5793	20.3904	28.1235	28.9562
piceifrons isolated 4 thorax	replicate 1	18.2017	22.1848	23.2588	20.1143	18.0706	17.4826	19.9525	25.1934	19.8233	28.1212	28.7052
	replicate 2	18.2491	22.1742	23.5182	20.135	18.0739	17.8251	19.9985	25.2487	19.8459	27.9266	28.7069
piceifrons isolated 5 thorax	replicate 1	19.8426	23.6079	25.4368	20.4286	20.0886	18.2729	20.3321	26.7263	22.0654	28.6056	30.0575
	replicate 2	19.8643	23.6646	25.4798	20.4805	20.1038	18.2812	20.3446	26.8011	22.0944	28.7842	30.4976
non-template control	replicate 1			38.0423						33.8505
	replicate 2									34.2472
