# Supplementary material for: There is no magic bullet: the importance of testing reference gene stability in RT-qPCR experiments across multiple closely related species
Source: PeerJ. 2020 Aug 3;8:e9618. doi: 10.7717/peerj.9618 (PMC7409783; doi:10.7717/peerj.9618)
Supplement: Supplemental Information 4 — The MIQE (Minimum Information for Publication of Quantitative Real-Time PCR Experiments) checklist contains all information that should be included in a manuscript describing RT-qPCR data. The checklist was filled in to represent which information is present in this paper. [file peerj-08-9618-s004.xls]

## Sheet: Sheet1
ITEM TO CHECK	IMPORTANCE	CHECKLIST
EXPERIMENTAL DESIGN
Definition of experimental and control groups	E	Present
Number within each group	E	Present
Assay carried out by core lab or investigator's lab?	D	Present
Acknowledgement of authors' contributions	D	Present
SAMPLE
Description	E	Present
Volume/mass of sample processed	D	Present
Microdissection or macrodissection	E	Present
Processing procedure	E	Present
If frozen - how and how quickly?	E	Present
If fixed - with what, how quickly?	E	Present
Sample storage conditions and duration (especially for FFPE samples)	E	Present
NUCLEIC ACID EXTRACTION
Procedure and/or instrumentation	E	Present
Name of kit and details of any modifications	E	Present
Source of additional reagents used	D	Present
Details of DNase or RNAse treatment	E	Present
Contamination assessment (DNA or RNA)	E	Present
Nucleic acid quantification	E	Present
Instrument and method	E	Present
Purity (A260/A280)	D	Present
Yield	D
RNA integrity method/instrument	E	Present
RIN/RQI or Cq of 3' and 5' transcripts	E	Present
Electrophoresis traces	D
Inhibition testing (Cq dilutions, spike or other)	E
REVERSE TRANSCRIPTION
Complete reaction conditions	E	Present
Amount of RNA and reaction volume	E	Present
Priming oligonucleotide (if using GSP) and concentration	E	Present
Reverse transcriptase and concentration	E	Present
Temperature and time	E	Present
Manufacturer of reagents and catalogue numbers	D	Present
Cqs with and without RT	D*
Storage conditions of cDNA	D
qPCR TARGET INFORMATION
If multiplex, efficiency and LOD of each assay.	E	NA
Sequence accession number	E	Present
Location of amplicon	D
Amplicon length	E	Present
In silico specificity screen (BLAST, etc)	E
Pseudogenes, retropseudogenes or other homologs?	D
Sequence alignment	D
Secondary structure analysis of amplicon	D
Location of each primer by exon or intron (if applicable)	E	NA
What splice variants are targeted?	E	NA
qPCR OLIGONUCLEOTIDES
Primer sequences	E	Present
RTPrimerDB Identification Number	D
Probe sequences	D**
Location and identity of any modifications	E	NA
Manufacturer of oligonucleotides	D	Present
Purification method	D
qPCR PROTOCOL
Complete reaction conditions	E	Present
Reaction volume and amount of cDNA/DNA	E	Present
Primer, (probe), Mg++ and dNTP concentrations	E	Present
Polymerase identity and concentration	E	Present
Buffer/kit identity and manufacturer	E	Present
Exact chemical constitution of the buffer	D
Additives (SYBR Green I, DMSO, etc.)	E	Present
Manufacturer of plates/tubes and catalog number	D
Complete thermocycling parameters	E	Present
Reaction setup (manual/robotic)	D
Manufacturer of qPCR instrument	E	Present
qPCR VALIDATION
Evidence of optimisation (from gradients)	D
Specificity (gel, sequence, melt, or digest)	E	Present
For SYBR Green I, Cq of the NTC	E	Present
Standard curves with slope and y-intercept	E	Raw data present
PCR efficiency calculated from slope	E	Present
Confidence interval for PCR efficiency or standard error	D
r2 of standard curve	E	Raw data present
Linear dynamic range	E	Raw data present
Cq variation at lower limit	E	Raw data present
Confidence intervals throughout range	D
Evidence for limit of detection	E	Raw data present
If multiplex, efficiency and LOD of each assay.	E	NA
DATA ANALYSIS
qPCR analysis program (source, version)	E	present
Cq method determination	E	present
Outlier identification and disposition	E	NA
Results of NTCs	E	Present
Justification of number and choice of reference genes	E	Present
Description of normalisation method	E	Present
Number and concordance of biological replicates	D	Present
Number and stage (RT or qPCR) of technical replicates	E	Present
Repeatability (intra-assay variation)	E	Raw data present
Reproducibility (inter-assay variation, %CV)	D
Power analysis	D
Statistical methods for result significance	E	Present
Software (source, version)	E	Present
Cq or raw data submission using RDML	D
Table 1. MIQE checklist for authors, reviewers and editors. All essential information (E) must be submitted with the manuscript. Desirable
information (D) should be submitted if available. If using primers obtained from RTPrimerDB, information on qPCR target, oligonucleotides,
protocols and validation is available from that source.
*: Assessing the absence of DNA using a no RT assay is essential when first extracting RNA. Once the sample has been validated as
RDNA-free, inclusion of a no-RT control is desirable, but no longer essential.
**: Disclosure of the probe sequence is highly desirable and strongly encouraged. However, since not all commercial pre-designed assay
vendors provide this information, it cannot be an essential requirement. Use of such assays is advised against.
